# Supplementary material for: Sequence-defined structural transitions by calcium-responsive proteins
Source: Royal Society of Chemistry journal article supplement (doi:10.1039/d4py00907j), 2024-01-01
Supplement: d4py00907j1.pdf [file d4py00907j1.pdf]

## Supporting Information for

### Sequence-defined structural transitions by calcium-responsive proteins

Marina P. Chang,<sup>1</sup> Winnie Huang,<sup>2</sup> Gatha M. Shambharkar,<sup>1</sup> Kenny M. Hernandez,<sup>2</sup> and Danielle J. Mai<sup>\*2</sup>

<sup>1</sup>Department of Materials Science and Engineering, Stanford University, Stanford, CA 94305

<sup>2</sup>Department of Chemical Engineering, Stanford University, Stanford, CA 94305

\*To whom correspondence may be addressed. Email: [djmai@stanford.edu](mailto:djmai@stanford.edu)

#### Table of Contents

- I. DNA and protein sequences for RTX variants
- II. Table of protein properties
- III. Protein purification
- IV. MALDI-TOF MS of RTX variants
- V. Equations used to calculate protein concentration, mean residue ellipticity, and secondary structure comparisons
- VI. Circular dichroism replicates
- VII. Circular dichroism time studies
- VIII. Results from deconvolution of circular dichroism data with CDPro

## I. DNA and protein sequences for RTX variants

Genes encoding each protein variant were flanked with restriction sites for directional cloning and purchased as gene fragments (Twist Bioscience). Genes were subcloned into pQE-9 using BamHI and HindIII restriction sites, bolded in the sequences below.

### Block V (Wild Type) DNA sequence

CCCCGTCACCTTTGGCTTATCAGT**GGATCC**CATATGGAGCTCGGCGCTAGCGGCAGCGCACGCGA  
CGATGTCCTTATCGGCGATGCGGGCGCTAACGTCCTCAACGGACTGGCTGGTAATGACGTATTAT  
CAGGAGGGGACAGGTGACGATGTGTTATTAGGGGACGAAGGCAGTGATTTGCTGTCTGGGGATGCA  
GGAAACGATGATCTGTTCGGTGGTCAGGGTGATGATACCTATCTGTTTGGGGTTGGTTACGGTCA  
CGACACGATCTATGAGTCCGGCGGCGGCCACGATAACAATCCGTATTAATGCCGGAGCAGACCAAC  
TGTGGTTTGC GCGCCAGGGAAATGATCTTGA AATACGTATTCTCGGTACCGATGATGCGTTGACT  
GTTTCATGATTGGTATCGGGACGCTGATCATAGAGTTGAAATAATTCATGCAGCGAATCAGGCTGT  
GGATCAAGCCGGTATTGAAAACTGGTAGAGGCCATGGCCCAGTACCCGGACGAATTCCTAGTCTC  
TCGAG**AAGCTT**TAGATCTAGTGACATCTGGACGCTAAGACCG

### Block V (Wild Type) protein sequence

MRGSHHHHHHSHMELGASGSARDDVLI GDAGANVNLNGLAGNDVLSGGAGDDVLLGDEGSDDL  
DAGNDLFGGQGGDITYLFGVGYGHDTIYESGGGHDTIRINAGADQLW FARQGNLDLEIRILGTDDA  
LTVHDWYRDADHRVEI IHAANQAVDQAGIEKLVEAMAQYPDEFTSLEKLN\*

### Global Substitution – Alanine DNA sequence

CCCCGTCACCTTTGGCTTATCAGTGGATCCCATATGGAGCTCGGCGCTAGCGGTAGTGC GCGCGC  
GGATGTTCTGATAGCGATGCGGGTGCAAATGTGCTGAACGGGTTAGCCGGTGCAGACGTTCTGT  
CTGGTGGAGCAGGAGCCGACGTTCTTCTCGGCGATGAGGGCGCCGATCTGTTATCAGGTGACGCC  
GGGGCCGACGATCTGTTTGGGGGCCAGGGAGCCGATACGTACTTGTTCGGCGTGGGCTACGGTGC  
GGACACCATCTATGAAAGCGGTGGAGGTGCAGATACCATTTCGTATCAACGCTGGAGCAGATCAGC  
TCTGGTTTGTCTCGCCAGGGCAATGATCTTGA AATTCGTATATTGGGGACTGACGATGCTCTGACA  
GTACATGATTGGTATAGAGATGCGGATCACCGGGTCGAAATTATTCATGCTGCAAATCAGGCAGT  
AGATCAAGCGGTATCGAAAAATTAGTCGAGGCCATGGCTCAATATCCGGACGAATTCCTAGTCTC  
TCGAGAAGCTTAGATCTAGTGACATCTGGACGCTAAGACCG

### Global Substitution – Alanine protein sequence

MRGSHHHHHHSHMELGASGSARADVLI GDAGANVNLNGLAGADVLSGGAGADVLLGDEGADLLSG  
DAGADLFGGQGADTYLFGVGYGADTIYESGGGADTIRINAGADQLW FARQGNLDLEIRILGTDDA  
LTVHDWYRDADHRVEI IHAANQAVDQAGIEKLVEAMAQYPDEFTSLEKLN\*

### Global Substitution – Histidine DNA sequence

CAATCCGCCCTCACTACAACCGGGATCCCATATGGAGCTCGGCGCTAGCGGAAGCGCTCGACACG  
ACGTA CTTATCGGAGACGCGGGACACAATGTCCTTAATGGCCTTGCTGGTCACGACGTGCTTAGC  
GGCGGTGCAGGACATGACGTGTTATTGGGTGATGAGGGGCACGACCTGCTGTCTGGTGACGCAGG  
CCATGATGACTTATTCGGTGGTCAAGGTCATGATACTTACTTGT TGGCGTGGGCTATGGACACG  
ACACGATTTACGAATCAGGCGGCGGACACGATACTATAAGAATCAATGCTGGAGCGGACCAACTG  
TGGTTCGCCAGACAAGGTAATGACCTGGAGATACGCATCCTCGGTACAGACGATGCCTTAACTGT  
ACATGACTGGTACCGTGATGCTGACCATCGTGTGCGAGATAATACACGCCGCGAACCAAGCAGTGG  
ACCAAGCTGGGATTGAGAAGTTAGTCGAGGCAATGGCTCAATACCCCGACGAATTCCTAGTCTC  
GAGAAGCTTAGATCTCTACTCTGGCGTGCATGAGGGA

**Global Substitution – Histidine protein sequence**

MRGSHHHHHHGSHMELGASGSARHDVLI GDAGHNVLNGLAGHDVLSGGAGHDVLLGDEGHDL LSG  
DAGHDDLFGGQGHDTY LFGVGYGHDTIYESGGGHDTIRINAGADQLWFARQNDLEIRILGTDDA  
LTVHDWYRDADHRVEI IHAANQAVDQAGIEKLVEAMAQYPDEFTSLEKLN\*

**Global Substitution – Serine DNA sequence**

CAATCCGCCCTCACTACAACCGGGATCCCATATGGAGCTCGGCGCTAGCGGTAGCGCTCGTAGTG  
ACGTGCTGATAGGGGACGCAGGTAGTAATGTACTGAACGGGCTCGCCGGTAGCGATGTCTTGAGT  
GGTGGGGCTGGTTCTGACGTTTTGCTTGCGCAGCAGGGCTCTGATCTTTTAAGTGGAGACGCGGG  
TTCTGACGACCTCTTCGGTGGACAGGGCAGCGACACCTACTTATTTGGTGTTCGGATACGGCAGCG  
ACACGATCTACGAGTCAGGCGGCGGCAGCGACACGATTCTGATTAAACGCGGGTCTGACCAACTG  
TGGTTCGCCCCCAAGGGAATGACTTGGAGATTCTGATTCTGGGCACCTGACGACGCCTTAACCGT  
TCACGACTGGTATCGGGATGCGGATCATAGAGTCGAAATCATCCACGCTGCGAATCAGGCGGTTCG  
ACCAGGCCGGAATTGAAAAGCTCGTTGAGGCCATGGCTCAGTACCCGGACGAATCACTAGTCTC  
GAGAAGCTTAGATCTCTACTCTGGCGTCGATGAGGGA

**Global Substitution – Serine protein sequence**

MRGSHHHHHHGSHMELGASGSARSVDLIGDAGSNVLNGLAGSDVLSGGAGSDVLLGDEGSDLLSG  
DAGSDDLFGGQGSPTY LFGVGYGSDTIYESGGSDTIRINAGADQLWFARQNDLEIRILGTDDA  
LTVHDWYRDADHRVEI IHAANQAVDQAGIEKLVEAMAQYPDEFTSLEKLN\*

**Global Substitution – Asparagine DNA sequence**

CAATCCGCCCTCACTACAACCGGGATCCCATATGGAGCTCGGCGCTAGCGGTAGCGCACGCAATG  
ACGTTCTGATAGGAGATGCCGGCAATAATGTTCTTAACGGACTCGCTGGTAACGATGTATTATCA  
GGTGGGGCGGGCAATGACGTTCTGTTGGGCGACGAGGGAAACGACTTACTGTCCGGGTGACGCTGG  
TAACGACGATTTGTTTGGCGGGCAAGGCAATGACACTTATCTGTTCCGGCGTTGGTTATGGTAATG  
ACACCATATATGAGTCCGGCGGTGGAAACGACACCATAAGAATAAATGCGGGCGCGGACCAACTG  
TGGTTTGTCTCGCCAAGGCAATGACCTTGAATTCGGATTCTTGGAACAGACGACGCTCTCACAGT  
CCACGACTGGTATCGCGACGCAGATCATAGAGTGGAGATAATACATGCCGCCAACCAAGCAGTTG  
ATCAGGCCGGCATAGAAAAGCTGGTAGAGGCCATGGCTCAATACCCCGATGAATCACTAGTCTC  
GAGAAGCTTAGATCTCTACTCTGGCGTCGATGAGGGA

**Global Substitution – Asparagine protein sequence**

MRGSHHHHHHGSHMELGASGSARNVDLIGDAGNVLNGLAGNDVLSGGAGNDVLLGDEGNDLLSG  
DAGNDDLFGGQGNPTY LFGVGYGNDTIYESGGNDTIRINAGADQLWFARQNDLEIRILGTDDA  
LTVHDWYRDADHRVEI IHAANQAVDQAGIEKLVEAMAQYPDEFTSLEKLN\*

**Global Substitution – Aspartic acid DNA Sequence**

CCCCGTCACCTTTGGCTTATCAGTGGATCCCATATGGAGCTCGGCGCTAGCGGTTCTGCCAGAGA  
CGATGTACTCATTGGTGATGCGGGTGATAATGTTCTCAACGGTTTAGCAGGCGATGACGTTCTGA  
GTGGGGGAGCTGGTGACGACGTATTACTGGGCGATGAAGGAGATGATCTGCTTAGCGGAGATGCT  
GGCGATGATGACTTGTTCGGGGGTGAGGGCGATGACACGATTTGTTTGGAGTGGGCTATGGTGA  
CGACACAATCTATGAGTCAGGGGGTGGGGATGACACCATTCTGATCAATGCAGGCGCGGATCAAC  
TGTGGTTTGTCTCGGCAGGGCAATGATCTTGAGATCCGCATACTGGTACTGATGATGCCCTGACC  
GTCCATGATTGGTACCGTGACGCGGATCATCGCGTTGAAATAATTCACGCCGCTAACCAAGCAGT  
GGATCAGGCCGGAATTGAAAATTAGTTCGAAGCGATGGCACAGTACCCGGATGAATCACTAGTC  
TCGAGAAGCTTAGATCTAGTGACATCTGGACGCTAAGACCG

**Global Substitution – Aspartic acid protein sequence**

MRGSHHHHHHGHSHMELGASGSARDDVLI GDAGDNVNLNGLAGDDVLSGGAGDDVLLGDEGDDLLSG  
DAGDDDLFGGQGD DTYLFGVGYGDDTIYESGGGDDTIRINAGADQLWFARQGN DLEIRILGTDDA  
LTVHDWYRDADHRVEI IHAANQAVDQAGIEKLVEAMAQYPDEFTSLEKLN\*

**Global Substitution – Glutamic acid DNA sequence**

CAATCCGCCCTCACTACAACCGGGATCCCATATGGAGCTCGGCGCTAGCGGTTCTGCAAGAGAAG  
ATGTTCTCATTGGCGACGCCGGCGAGAACGTTCTGAATGGTTTGGCCGGAGAAGACGTGTTATCG  
GGCGGCGCGGGAGAGGACGTATTGCTCGGTGACGAGGGTGAAGACCTGCTGAGTGGTGATGCAGG  
CGAGGACGATCTGTTTGGTGGACAAGGCGAGGACACATACTTGTTCGGAGTGGGGTACGGAGAGG  
ACACTATCTATGAGTCTGGTGGTGGGGAAGATAACAATTCAATTAACGCAGGAGCAGACCAGTTA  
TGGTTTGTCTCGCCAGGGTAATGACCTTGAGATAAGAATCTTAGGTACCGATGACGCACCTCACCGT  
CCACGATTGGTATCGTGATGCGGACCACCGCGTGGAGATAAATTCATGCGGCAAACCAAGCTGTCTG  
ACCAAGCCGGCATTGAGAAGCTGGTAGAGGCAATGGCCCAATATCCGGATGAATTCAGTGTCTC  
GAGAAGCTTAGATCTCTACTCTGGCGTTCGATGAGGGA

**Global Substitution – Glutamic acid protein sequence**

MRGSHHHHHHGHSHMELGASGSAREDVLI GDAGENVNLNGLAGEDVLSGGAGEDVLLGDEGEDLLSG  
DAGEDDLFGGQGEDTYLFGVGYGEDTIYESGGGEDTIRINAGADQLWFARQGN DLEIRILGTDDA  
LTVHDWYRDADHRVEI IHAANQAVDQAGIEKLVEAMAQYPDEFTSLEKLN\*

**Consensus Repeat – Alanine DNA sequence**

CAATCCGCCCTCACTACAACCGGGATCCCATATGGAGCTCGGCGCTAGCGGTGGAGCAGGGGCGG  
ACACTTTATACGGTGGTGCCGGCGCGGATACATTGTACGGTGGTGCGGGAGCTGATACCCTGTAC  
GGTGGCGCAGGTGCTGACACGTTATATGGCGGTGCTGGGGCTGACACATTGTATGGCGGTGCCGG  
GGCAGACACCTTATATGGTGGTGCCGGCGCGGATACCCTTTATGGTGGCGCAGGCGCGGATACTC  
TGACGGTGGTGCTGGAGCGGACACTCTGTATATTAACGCAGGAGCAGACCAGCTGTGGTTCGCA  
CGTCAAGGCAACGATCTGGAATAACGCATCCTGGGTACAGACGACGCCTTGACTGTCCACGACTG  
GTATCGTGACGCGGACCATCGCGTAGAGATTATACATGCAGCAAACCAAGCGGTAGATCAAGCTG  
GGATAGAGAACTGGTTCGAGGCCATGGCTCAATACCCGGATGAATTCAGTGTCTCGAGAAGCTT  
AGATCTCTACTCTGGCGTTCGATGAGGGA

**Consensus Repeat – Alanine protein sequence**

MRGSHHHHHHGHSHMELGASGGAGADTLYGGAGADTLYGGAGADTLYGGAGADTLYGGAGADTLYG  
GAGADTLYGGAGADTLYGGAGADTLYGGAGADTLYINAGADQLWFARQGN DLEIRILGTDDALTV  
HDWYRDADHRVEI IHAANQAVDQAGIEKLVEAMAQYPDEFTSLEKLN\*

**Consensus Repeat – Histidine DNA sequence**

CAATCCGCCCTCACTACAACCGGGATCCCATATGGAGCTCGGCGCTAGCGGTGGTGACAGGACATG  
ACACACTGTACGGCGGGGCGGGTTCATGATACTCTTTATGGCGGGCGCCGGCCACGATACTTTGTAT  
GGTGGAGCAGGCCACGACACCCTCTACGGTGGGGCTGGGCATGACACACTTTATGGCGGGGCGGG  
ACACGATACTCTGTACGGCGGGCGCTGGTCACGACACATTATATGGTGGCGCGGGGCATGATACTT  
TATACGGTGGAGCGGGCCACGATACACTGTACATCAATGCTGGAGCTGACCAACTTTGGTTCGCG  
CGCCAGGGTAACGACTTAGAGATCCGAATTTTGGGCACTGACGACGCCCTTACGGTACACGACTG  
GTACCGCGACGCAGACCACCGTGTGAGATCATCCACGCCCAACCAGGCAGTTGATCAAGCCG  
GCATCGAGAAATTAGTCAAGCTATGGCTCAGTACCCGGACGAATTCAGTGTCTCGAGAAGCTT  
AGATCTCTACTCTGGCGTTCGATGAGGGA

**Consensus Repeat – Histidine protein sequence**

MRGSHHHHHHGHSHMELGASGGAGHDTLYGGAGHDTLYGGAGHDTLYGGAGHDTLYGGAGHDTLYG  
GAGHDTLYGGAGHDTLYGGAGHDTLYGGAGHDTLYINAGADQLWFARQGN DLEIRILGTDDALTV  
HDWYRDADHRVEI IHAANQAVDQAGIEKLVEAMAQYPDEFTSLEKLN\*

**Consensus Repeat – Serine DNA sequence**

CAATCCGCCCTCACTACAACCGGGATCCCATATGGAGCTCGGCGCTAGCGGCGGTGCAGGAAGTG  
ATACACTTTACGGCGGAGCGGGCAGTGACACGTTGTACGGTGGGGCGGGTTCCGACACTTTATAC  
GGCGGAGCAGGTTTCAGACACTCTTTACGGTGGTGCAGGATCAGACACTCTCTATGGCGGGGCCGG  
CTCTGACACCTTGTACGGCGGAGCTGGTTCAGACACGTTATATGGCGGCGCGGGGTCAGACACAC  
TTTATGGCGGGGCAGGGAGCGACACACTGTACATTAACGCGGGAGCCGACCAGCTGTGGTTCGCG  
CGACAAGGTAATGACTTAGAGATACGTATCCTGGGGACAGATGACGCACTTACGGTGCATGACTG  
GTATAGAGACGCGGACCATCGTGTGAGATAATACACGCGGCCAACCAGGCGGTAGACCAGGCCG  
GTATTGAGAAGCTGGTTCGAGGCGATGGCACAATACCCCGACGAATCACTAGTCTCGAGAAGCTT  
AGATCTCTACTCTGGCGTTCGATGAGGGA

**Consensus Repeat – Serine protein sequence**

MRGSHHHHHHSHMELGASGGAGSDTLYGGAGSDTLYGGAGSDTLYGGAGSDTLYG  
GAGSDTLYGGAGSDTLYGGAGSDTLYGGAGSDTLYINAGADQLWFARQGNLEIRILGTDDALTV  
HDWYRDADHRVEIIHAANQAVDQAGIEKLVEAMAQYPDEFTSLEKLN\*

**Consensus Repeat – Asparagine DNA sequence**

CAATCCGCCCTCACTACAACCGGGATCCCATATGGAGCTCGGCGCTAGCGGCGGTGCAGGAAATG  
ACACACTGTATGGCGGTGCGGGTAAATGATACGTTATATGGCGGAGCTGGAAACGACACCCTTTAT  
GGTGGAGCCGGAACGACACCCTTTATGGCGGAGCTGGCAATGACACGCTTTACGGCGGTGCTGG  
TAACGACACCTTATATGGTGGAGCGGAAATGATACTCTGTATGGTGGTGC CGGAAATGATACAC  
TGTACGGTGGAGCCGTAATGATACTTTGTACATAAATGCCGGAGCAGACCAGCTCTGGTTCGCT  
CGCCAAGGCAATGACCTCGAAATTCGTATCTTAGGGACGGACGACGCGCTCACTGTTCATGATTG  
GTATCGGGATGCGGATCACCGTGTGAAATTATTACGCGGCTAACCAGGCTGTGACCAAGCAG  
GTATAGAGAACTTGTGGAAGCGATGGCCCAATATCCAGATGAATCACTAGTCTCGAGAAGCTT  
AGATCTCTACTCTGGCGTTCGATGAGGGA

**Consensus Repeat – Asparagine protein sequence**

MRGSHHHHHHSHMELGASGGAGNDTLYGGAGNDTLYGGAGNDTLYGGAGNDTLYG  
GAGNDTLYGGAGNDTLYGGAGNDTLYGGAGNDTLYINAGADQLWFARQGNLEIRILGTDDALTV  
HDWYRDADHRVEIIHAANQAVDQAGIEKLVEAMAQYPDEFTSLEKLN\*

**Consensus Repeat – Aspartic acid DNA sequence**

CAATCCGCCCTCACTACAACCGGGATCCCATATGGAGCTCGGCGCTAGCGGCGGTGCAGGTGATG  
ATACTCTGTACGGTGGTGCAGGGGATGATACTCTTTACGGCGGCGGGCGATGACACTTTATAT  
GGCGGAGCCGAGACGACACACTGTATGGTGGCGCCGGTGTATGACACATTGTACGGTGGGGCAGG  
GGACGACACACTCTACGGCGGCGCCGGCGATGATACTCTGTATGGTGGTGC GGGTGTATGACACCT  
TGTACGGCGGAGCCGGTGTATGACACACTTTACATCAACGCTGGGGCCGACCAATTATGGTTCGCC  
CGTCAGGGCAACGATTTGAAATTAGAATCCTGGGGACCGATGATGCTCTTACTGTGCACGACTG  
GTACCGGGATGCCGACCACCGTGTGAGATTATCCATGCAGCTAATCAAGCTGTAGACCAAGCAG  
GCATTGAGAACTTGTGAGGCCATGGCACAGTACCCAGATGAATCACTAGTCTCGAGAAGCTT  
AGATCTCTACTCTGGCGTTCGATGAGGGA

**Consensus Repeat – Aspartic acid protein sequence**

MRGSHHHHHHSHMELGASGGAGDDTLYGGAGDDTLYGGAGDDTLYGGAGDDTLYG  
GAGDDTLYGGAGDDTLYGGAGDDTLYGGAGDDTLYINAGADQLWFARQGNLEIRILGTDDALTV  
HDWYRDADHRVEIIHAANQAVDQAGIEKLVEAMAQYPDEFTSLEKLN\*

Consensus Repeat – Glutamic acid DNA sequence

CAATCCGCCCTCACTACAACCGGGATCCCATATGGAGCTCGGCGCTAGCGGCGGTGCAGGTGAAG  
ATACTCTCTACGGCGGTGCGGGTGAGGATACCTTGTACGGTGGAGCCGGTGAGGACACATTGTAC  
GGTGGCGCAGGTGAAGACACATTGTATGGCGGTGCTGGCGAAGACACGCTCTATGGTGGTGCTGG  
TGAGGACACGCTTTACGGTGGTGCAGGCGAGGACACCCTGTACGGTGGTGCCGGGAAGACACTC  
TTTACGGTGGAGCCGGCGAGGACACTCTTTACATAAATGCCGGCGCTGACCAGTTGTGGTTTGC  
CGCCAAGGAAATGATCTTGAAATACGCATCTTAGGAACCGACGACGCTTTAACCGTCCATGATTG  
GTACCGCGACGCGGACCATCGTGTGAGATCATTACGCTGCGAACCAAGCTGTTGATCAAGCCG  
GGATTGAGAAGCTGGTGAAGCAATGGCCCAATACCCGGATGAATTCCTAGTCTCGAGAAGCTT  
AGATCTCTACTCTGGCGTCGATGAGGGA

Consensus Repeat – Glutamic acid protein sequence

MRGSHHHHHHSHMELGASGGAGEDTLYGGAGEDTLYGGAGEDTLYGGAGEDTLYGGAGEDTLYG  
GAGEDTLYGGAGEDTLYGGAGEDTLYGGAGEDTLYINAGADQLWFARQNDLEIRILGTDDALTV  
HDWYRDADHRVEIIHAANQAVDQAGIEKLVEAMAQYPDEFTSLEKLN\*

## II. Table of protein properties

The protein sequence was used to calculate pI, molar extinction coefficient at 280 nm ( $\epsilon_{280}$ ), and expected molecular weight.<sup>1</sup> Observed molecular weight measured with matrix-assisted laser desorption/ionization time of flight mass spectrometry (MALDI-TOF MS).

**Table S1.** Protein variant properties

| Protein Variant            | pI   | $\epsilon_{280}$ ( $M^{-1} cm^{-1}$ ) | Expected Molecular Weight (kDa) | Observed Molecular Weight (kDa) |
|----------------------------|------|---------------------------------------|---------------------------------|---------------------------------|
| Block V (Wild Type)        | 4.40 | 18450                                 | 19.1                            | 19.1                            |
| <b>Global Substitution</b> |      |                                       |                                 |                                 |
| Alanine                    | 4.41 | 18450                                 | 18.7                            | 18.7                            |
| Histidine                  | 5.03 | 18450                                 | 19.3                            | 19.3                            |
| Serine                     | 4.41 | 18450                                 | 18.9                            | 18.9                            |
| Asparagine                 | 4.41 | 18450                                 | 19.1                            | 19.1                            |
| Aspartic acid              | 4.12 | 18450                                 | 19.1                            | 19.1                            |
| Glutamic acid              | 4.21 | 18450                                 | 19.3                            | 19.2                            |
| <b>Consensus Repeat</b>    |      |                                       |                                 |                                 |
| Alanine                    | 4.48 | 27390                                 | 18.1                            | 18.1                            |
| Serine                     | 4.48 | 27390                                 | 18.2                            | 18.2                            |
| Histidine                  | 5.25 | 27390                                 | 18.7                            | 18.7                            |
| Asparagine                 | 4.48 | 27390                                 | 18.5                            | 18.5                            |
| Aspartic acid              | 4.13 | 27390                                 | 18.5                            | 18.5                            |
| Glutamic acid              | 4.24 | 27390                                 | 18.6                            | 18.6                            |

<sup>1</sup>E. Gasteiger *et al.*, "Protein Identification and Analysis Tools on the ExPASy Server" in The Proteomics Protocols Handbook, J. M. Walker, Ed. (Humana Press, Totowa, NJ, 2005), 10.1385/1-59259-890-0:571, pp. 571-607.

### III. Protein purification

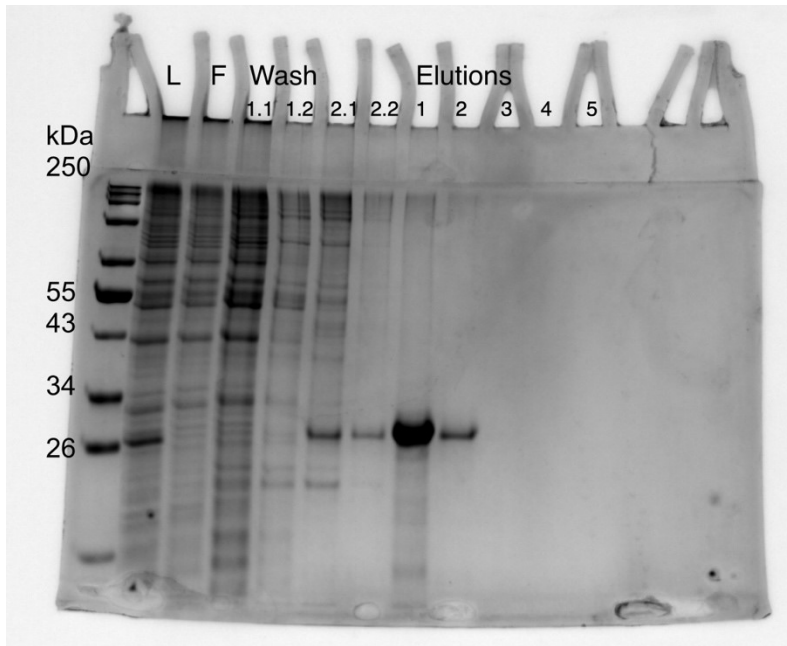

**Figure S1.** Representative SDS-PAGE of protein fractions from lysate (L), flowthrough (F), washes (1.1, 1.2, 2.1, 2.2), and elution (1-5) stages of Ni-NTA purification. Experimental conditions: 12% polyacrylamide, 200 V, 45 minutes, global substitution variant with asparagine.



IV. MALDI-TOF MS of RTX variants

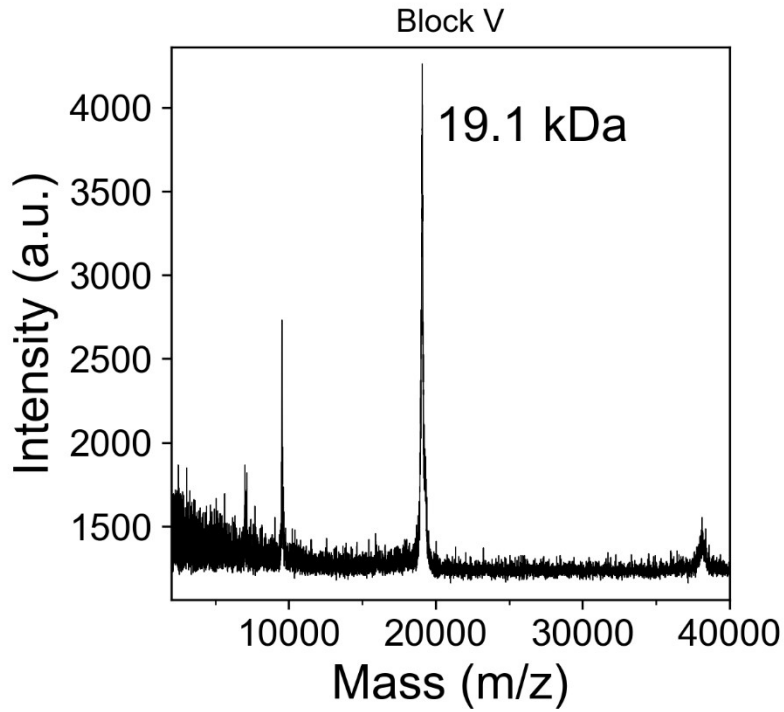

Figure S2. MALDI-TOF MS of Block V (expected 19.1 kDa).

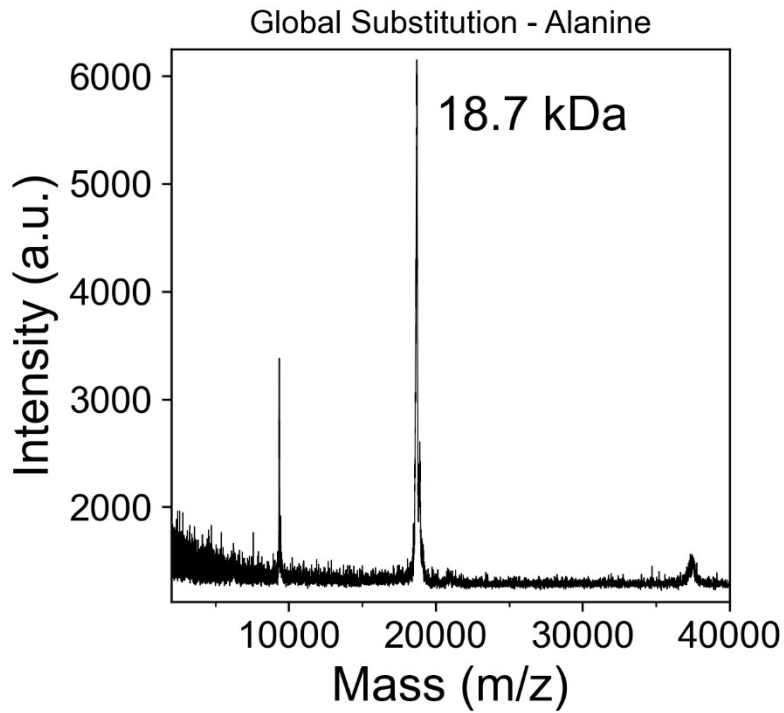

Figure S3. MALDI-TOF MS of global substitution – alanine (expected 18.7 kDa).

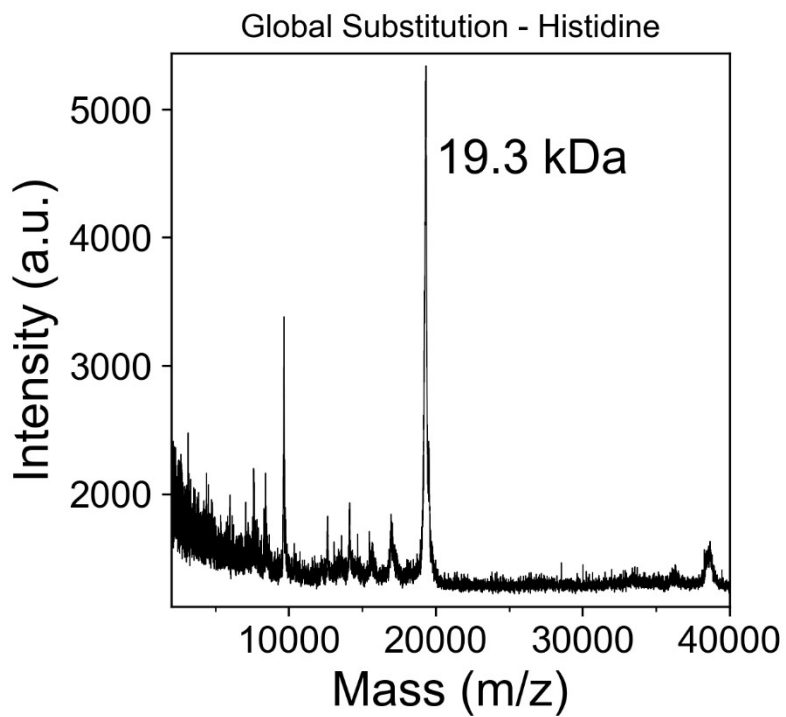

**Figure S4.** MALDI-TOF MS of global substitution – histidine (expected 19.3 kDa).

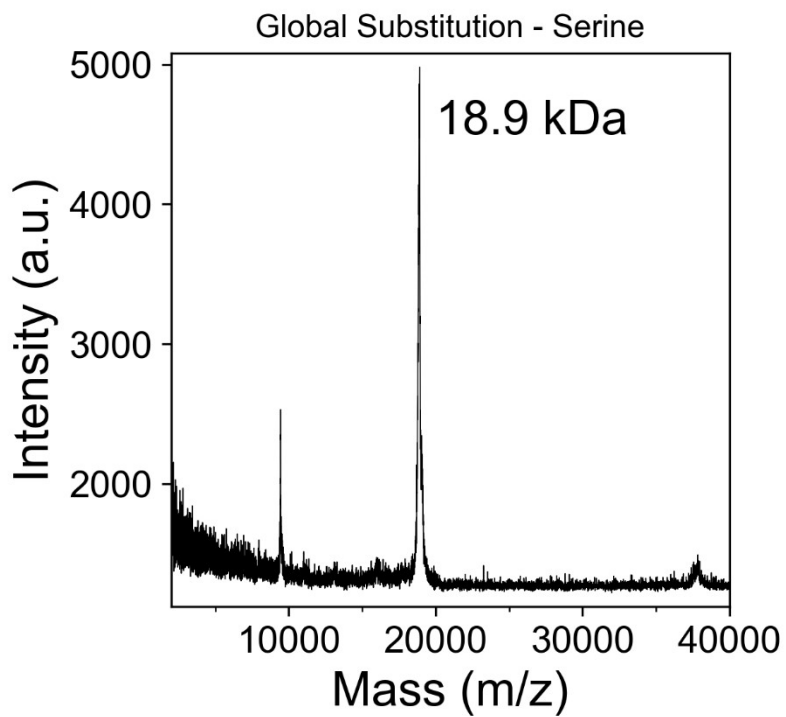

**Figure S5.** MALDI-TOF MS of global substitution – serine (expected 18.9 kDa).

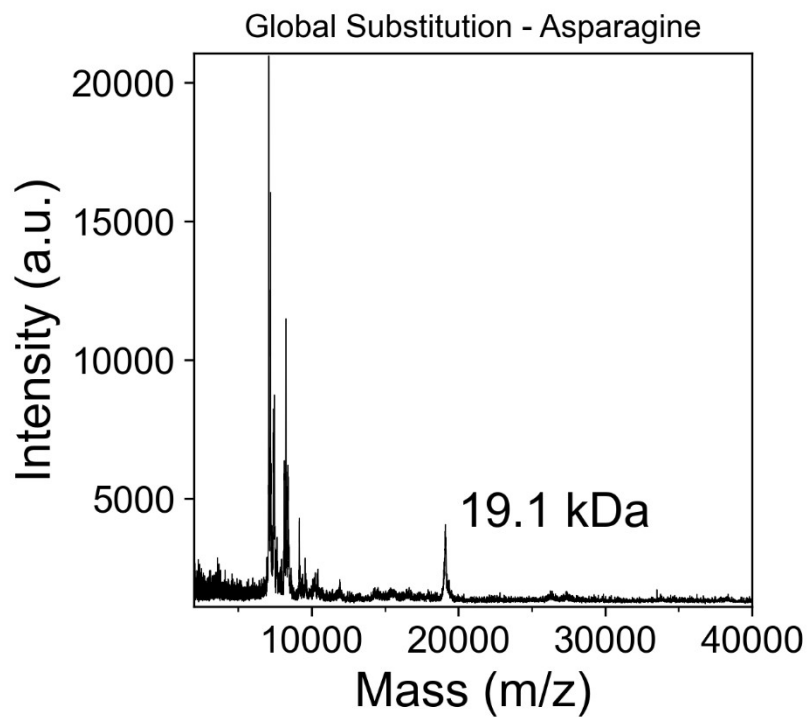

**Figure S6.** MALDI-TOF MS of global substitution – asparagine (expected 19.1 kDa).

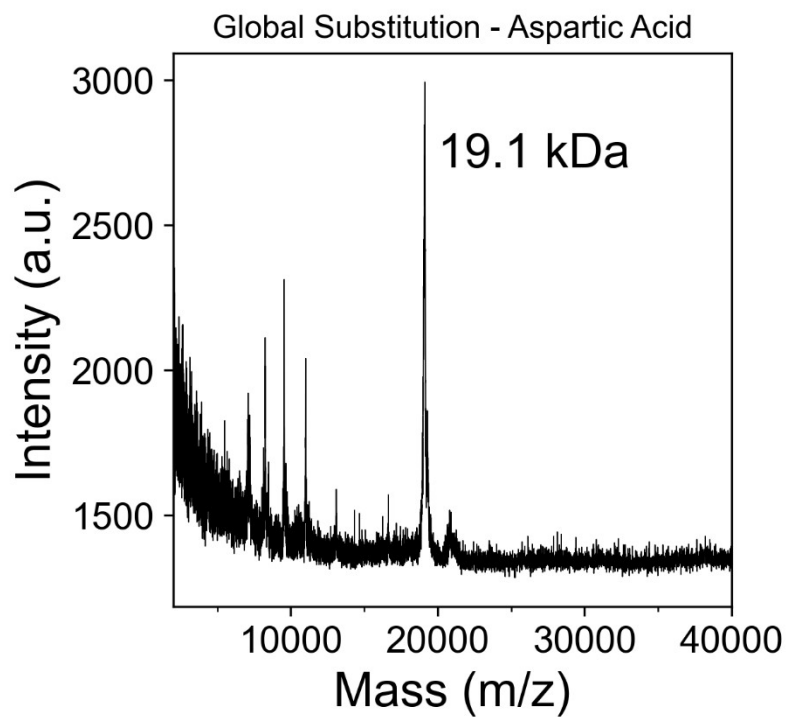

**Figure S7.** MALDI-TOF MS of global substitution – aspartic acid (expected 19.1 kDa).

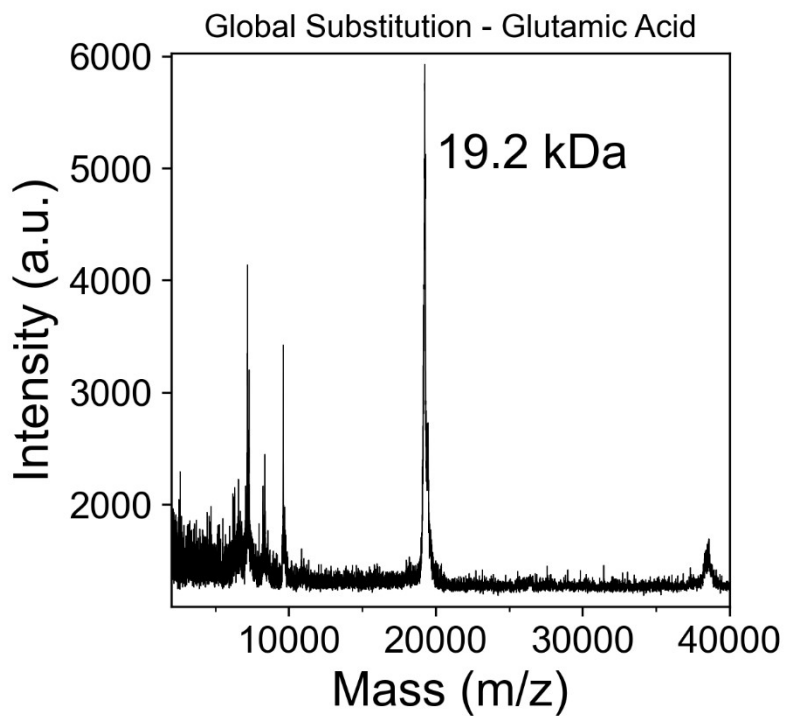

**Figure S8.** MALDI-TOF MS of global substitution – glutamic acid (expected 19.2 kDa).

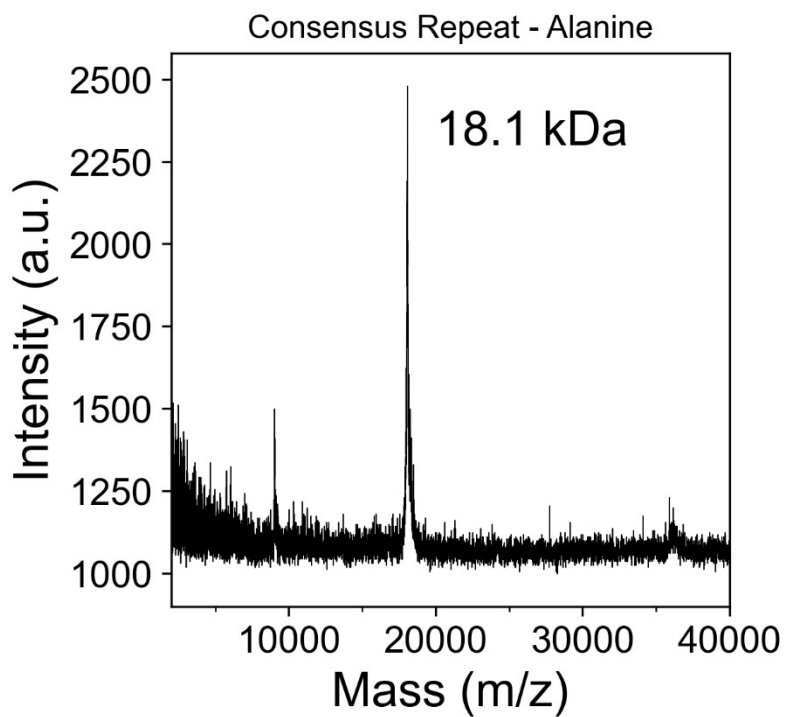

**Figure S9.** MALDI-TOF MS of consensus repeat – alanine (expected 18.1 kDa).

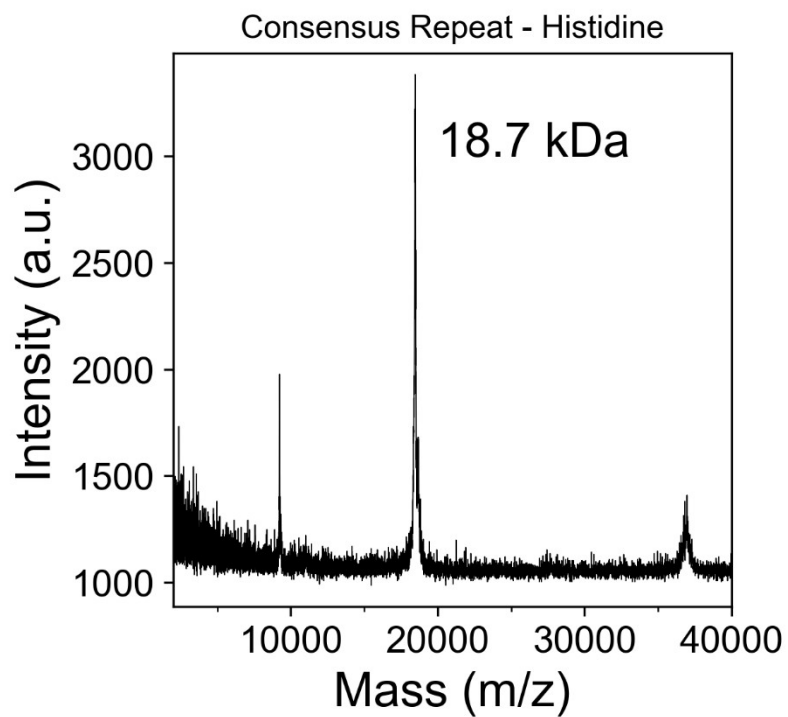

**Figure S10.** MALDI-TOF MS of consensus repeat – histidine (expected 18.7 kDa).

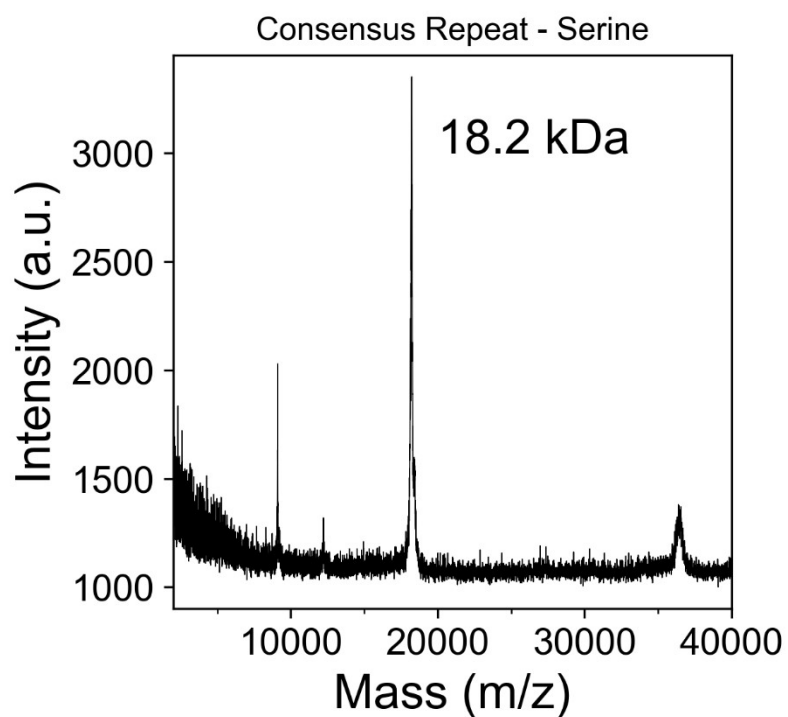

**Figure S11.** MALDI-TOF MS of consensus repeat – serine (expected 18.2 kDa).

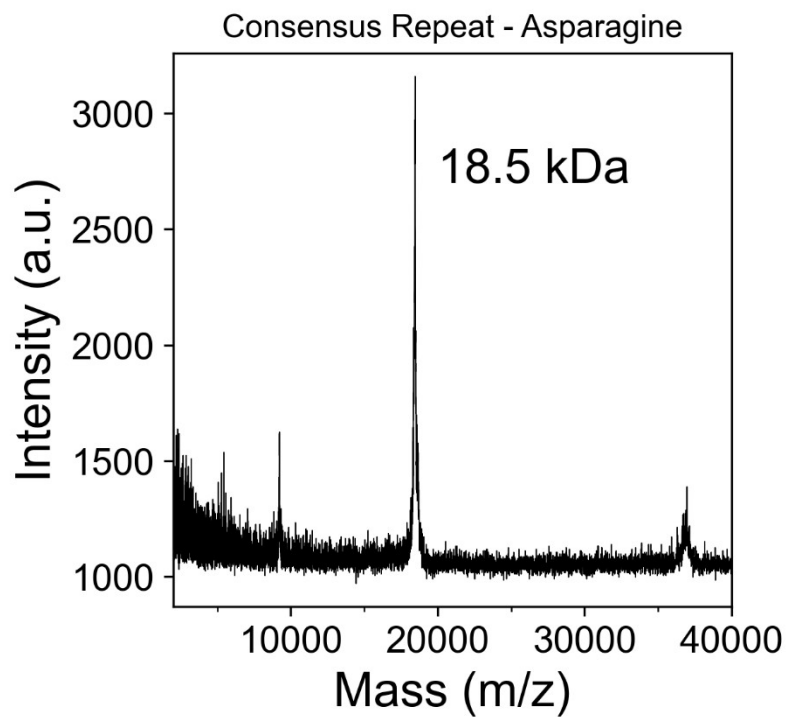

**Figure S12.** MALDI-TOF MS of consensus repeat – asparagine (expected 18.5 kDa).

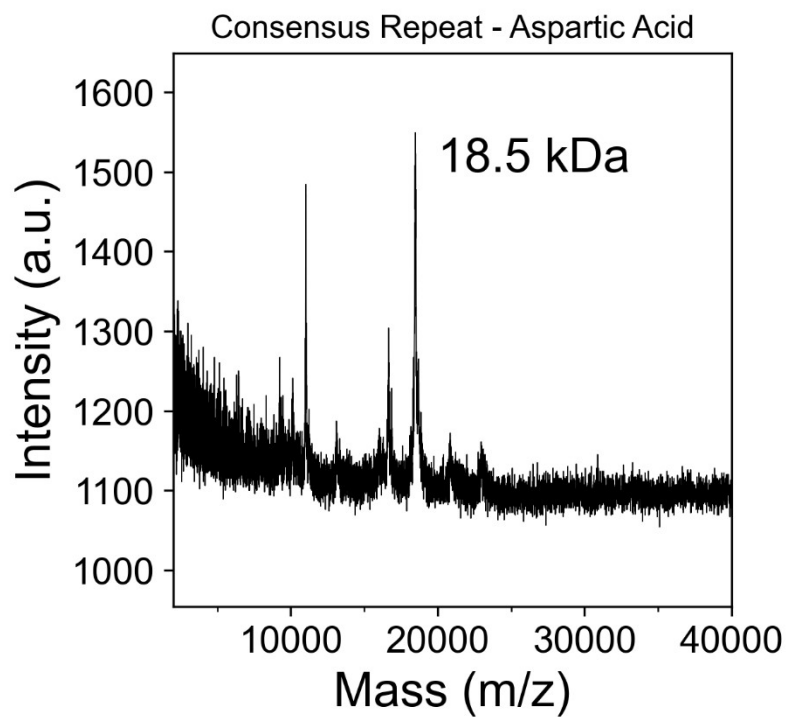

**Figure S13.** MALDI-TOF MS of consensus repeat – aspartic acid (expected 18.5 kDa).

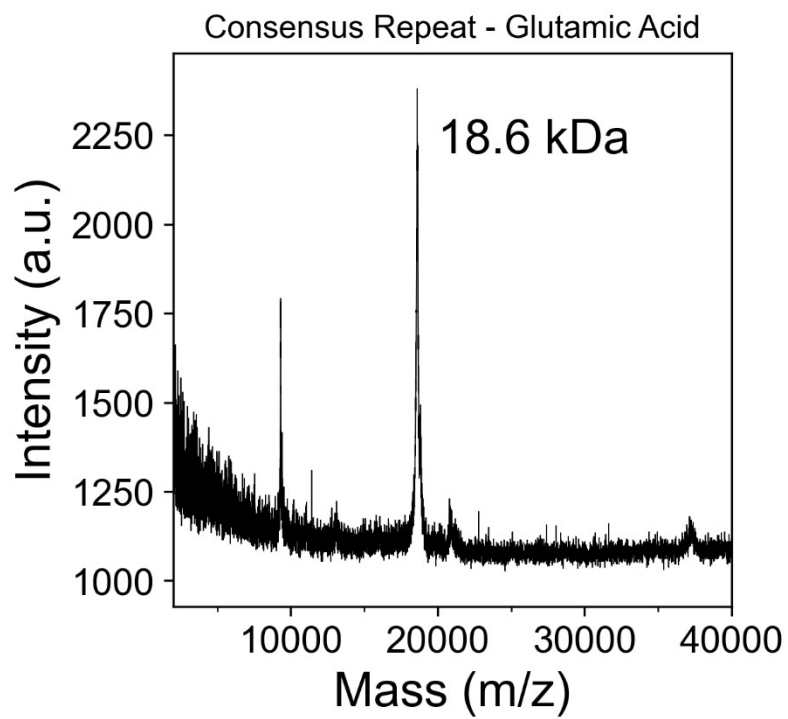

**Figure S14.** MALDI-TOF MS of consensus repeat – glutamic acid (expected 18.6 kDa).

## V. Equations used to calculate protein concentration, mean residue ellipticity, and secondary structure comparisons

**Protein concentration measurements.** The concentration of protein solutions was calculated from solution absorbance at 280 nm as measured with a NanoDrop One C Spectrometer. Protein solution concentration is calculated using the Beer–Lambert law:

$$A = \epsilon lc$$

where  $A$  is the absorbance,  $\epsilon$  is the molar extinction coefficient of the protein in units of  $M^{-1} \text{ cm}^{-1}$ ,  $l$  is the optical path length in cm, and  $c$  is the protein concentration in M.

The molar extinction coefficient at 280 nm for each protein variant is estimated using the following equation:

$$\epsilon_{\text{protein}} = N_{\text{Tyrosine}}\epsilon_{\text{Tyrosine}} + N_{\text{Tryptophan}}\epsilon_{\text{Tryptophan}} + N_{\text{Cysteine}}\epsilon_{\text{Cysteine}}$$

where  $N_{\text{Tyrosine}}$ ,  $N_{\text{Tryptophan}}$ , and  $N_{\text{Cysteine}}$  are the number of residues of each amino acid in the protein sequence, and the extinction coefficients of each amino acid are as follows:  $\epsilon_{\text{Tyrosine}} = 1490 \text{ M}^{-1} \text{ cm}^{-1}$ ,  $\epsilon_{\text{Tryptophan}} = 5500 \text{ M}^{-1} \text{ cm}^{-1}$ , and  $\epsilon_{\text{Cysteine}} = 125 \text{ M}^{-1} \text{ cm}^{-1}$ .

**Mean residue ellipticity calculations.** Ellipticity measured by circular dichroism was converted to mean residue ellipticity (MRE) to facilitate the comparison of protein samples with different concentrations and protein variants with different numbers of residues. MRE is calculated using the following equation:

$$[\theta] = 100 \theta / (c l N)$$

where  $[\theta]$  is MRE in  $\text{deg cm}^2 \text{ dmol}^{-1}$ ,  $\theta$  is ellipticity in degrees,  $c$  is the protein concentration in M,  $l$  is the path length of the cuvette in cm, and  $N$  is the number of residues in the protein.

**Secondary structure comparisons.** The relative percent change of a structural component (i.e. the relative percent increase in sheet content from 0 mM  $\text{CaCl}_2$  to 100 mM  $\text{CaCl}_2$ ) is calculated using the following equation:

$$Z = \left( \frac{X - X_0}{X_0} \right) \times 100\%$$

where  $X$  is the final structural content,  $X_0$  is the starting structural content, and  $Z$  is the relative percent change.

Similarly, a comparison of a structural component between two variants (i.e. the relative higher sheet content in a consensus repeat variant compared to Block V) is calculated using the following equation:

$$Z = \left( \frac{X_2 - X_1}{X_1} \right) \times 100\%$$

where  $X_2$  is the variant structural content,  $X_1$  is the reference structural content (typically Block V), and  $Z$  is the relative percent difference.



## VI. Circular Dichroism Replicates

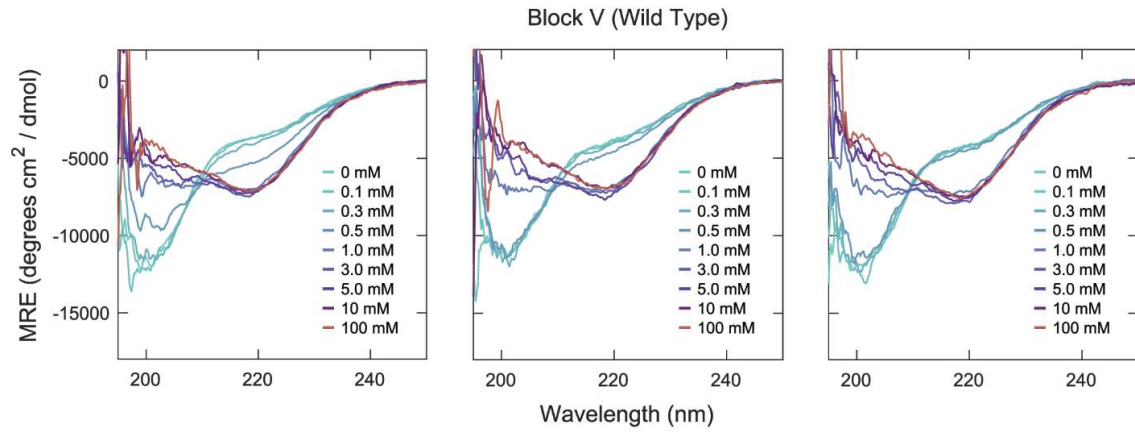

**Figure S15.** Triplicate circular dichroism measurements of Block V (Wild Type).

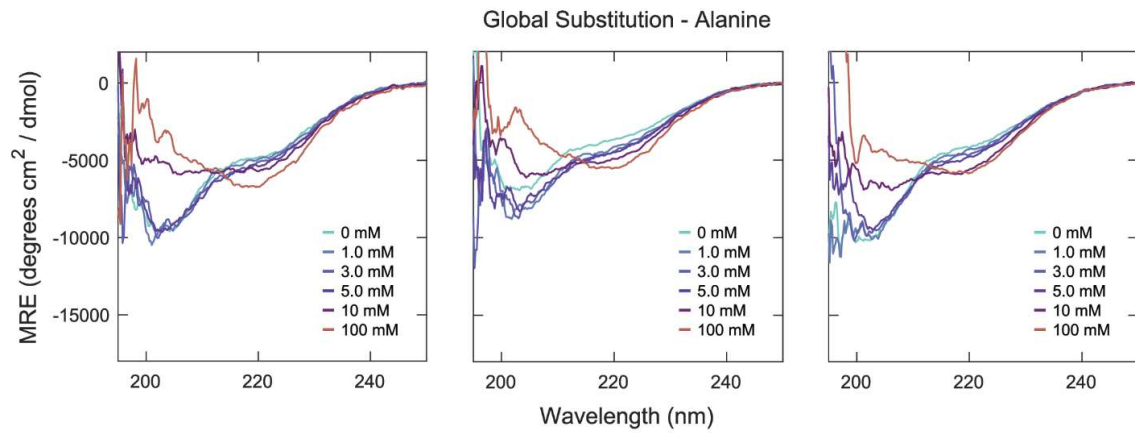

**Figure S16.** Triplicate circular dichroism measurements of global substitution – alanine.

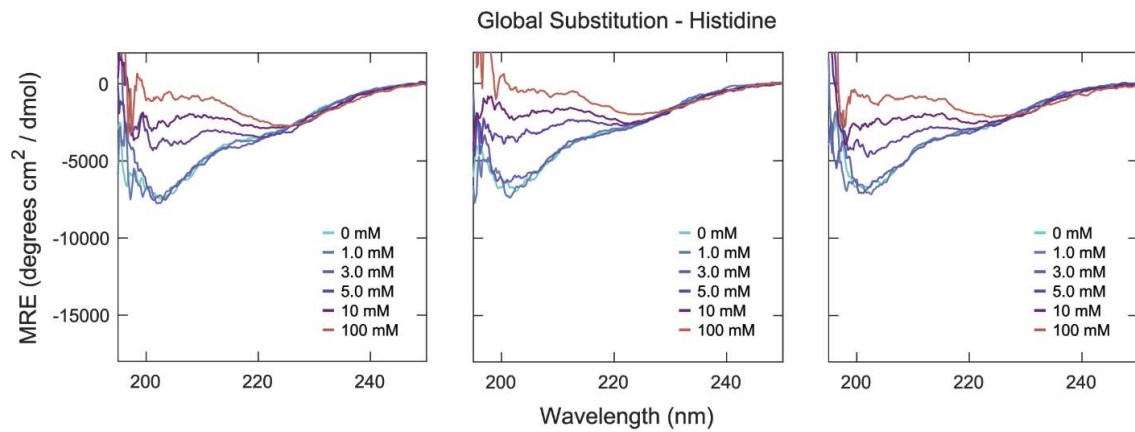

**Figure S17.** Triplicate circular dichroism measurements of global substitution – histidine.

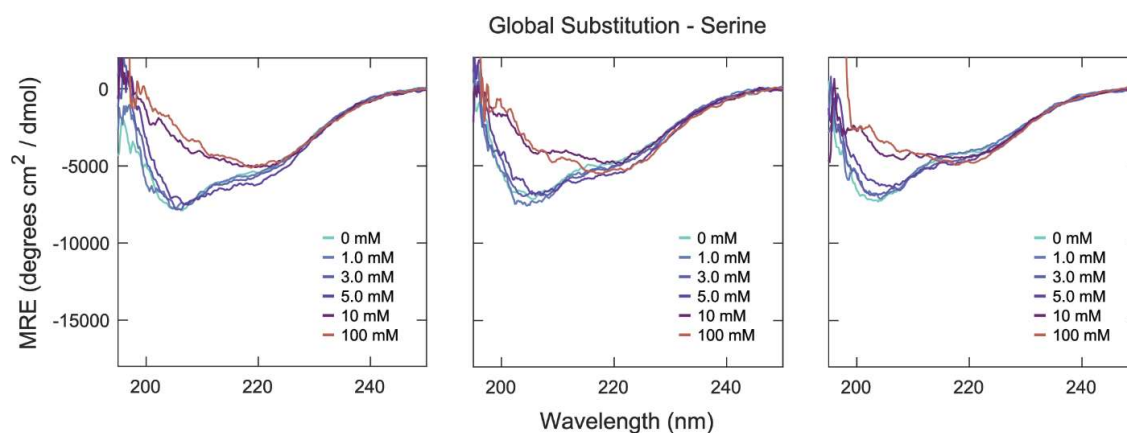

**Figure S18.** Triplicate circular dichroism measurements of global substitution – serine.

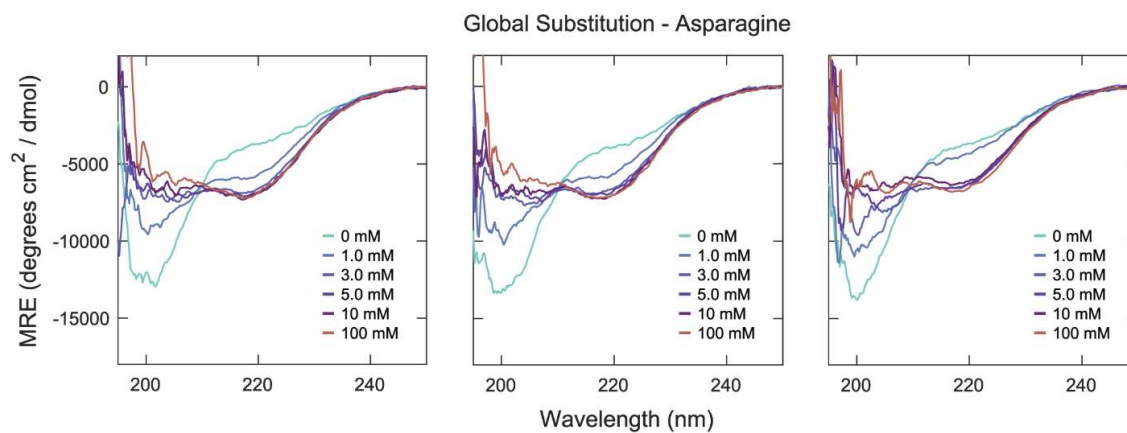

**Figure S19.** Triplicate circular dichroism measurements of global substitution – asparagine.

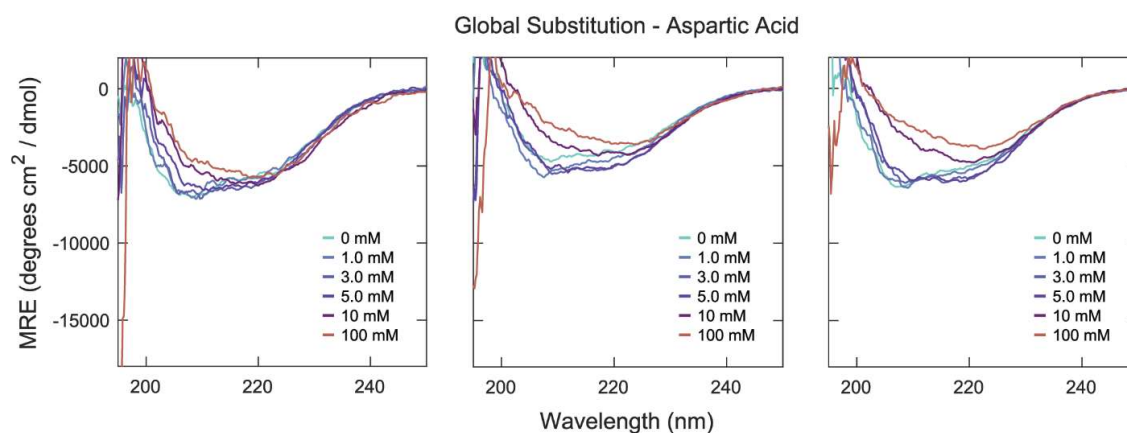

**Figure S20.** Triplicate circular dichroism measurements of global substitution – aspartic acid.

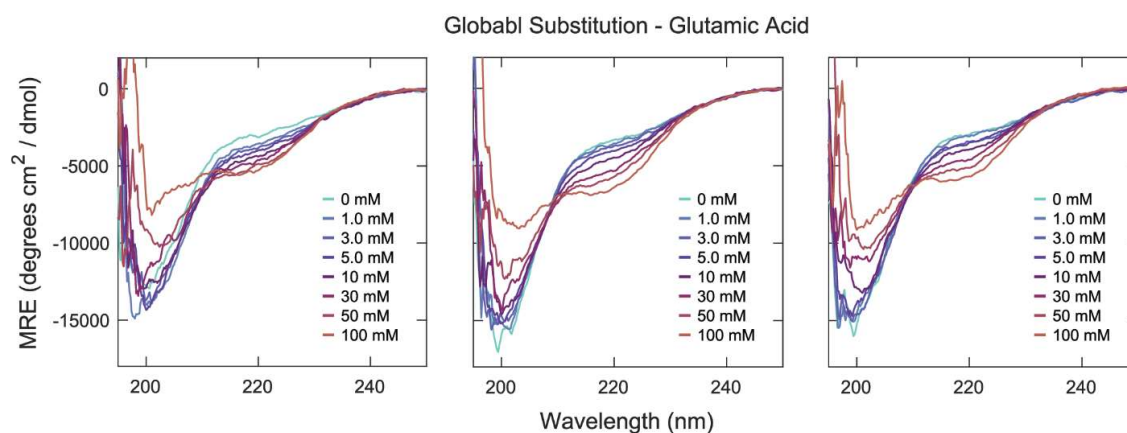

**Figure S21.** Triplicate circular dichroism measurements of global substitution – glutamic acid.

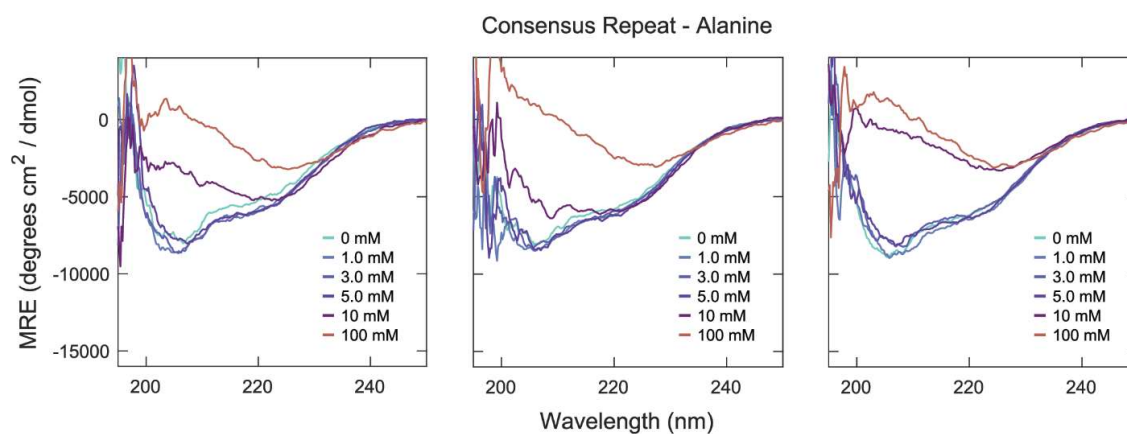

**Figure S22.** Triplicate circular dichroism measurements of consensus repeat – alanine.

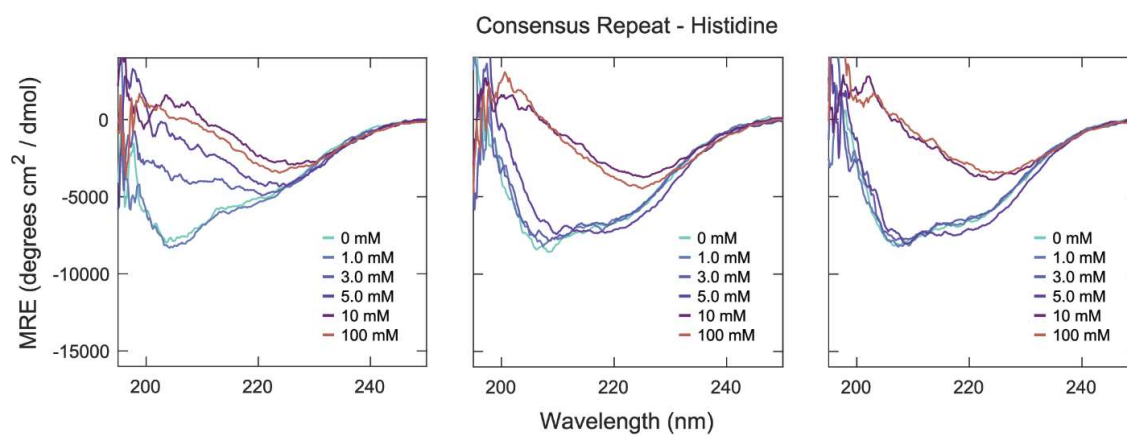

**Figure S23.** Triplicate circular dichroism measurements of consensus repeat – histidine.

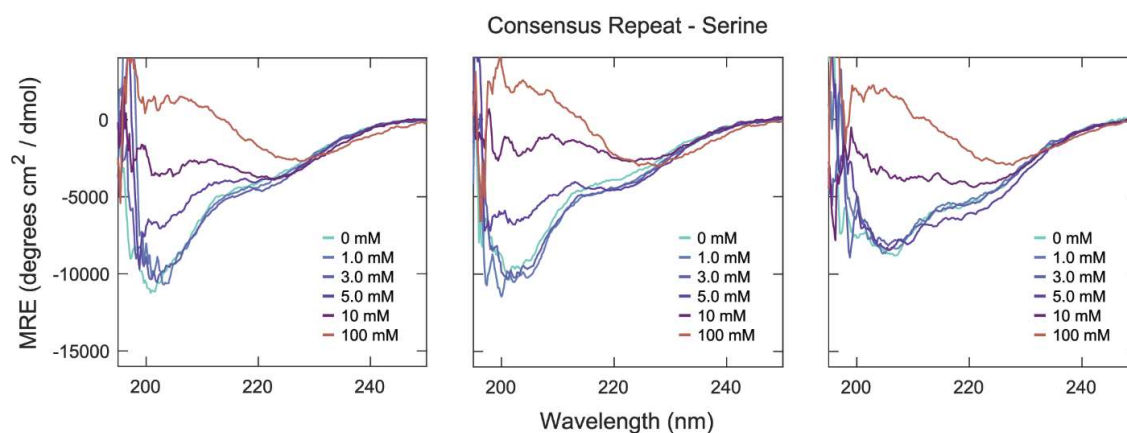

**Figure S24.** Triplicate circular dichroism measurements of consensus repeat – serine.

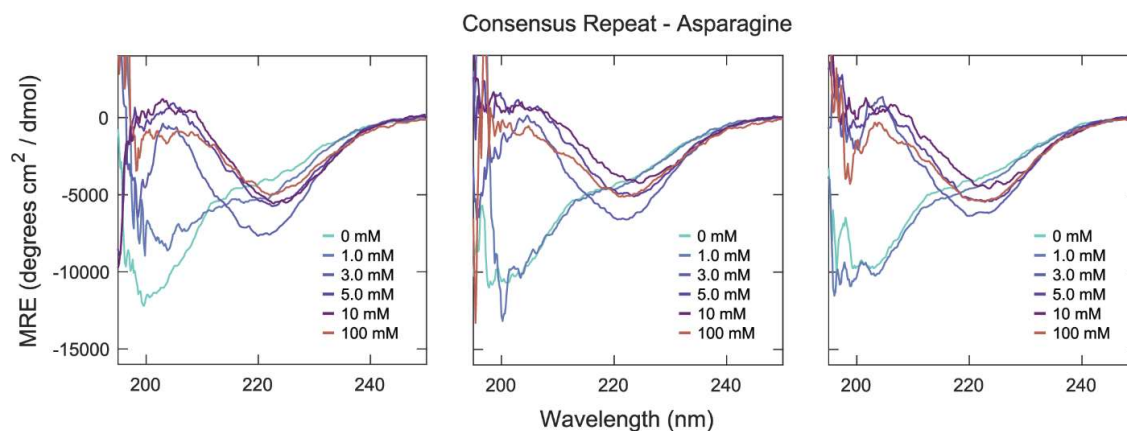

**Figure S25.** Triplicate circular dichroism measurements of consensus repeat – asparagine.

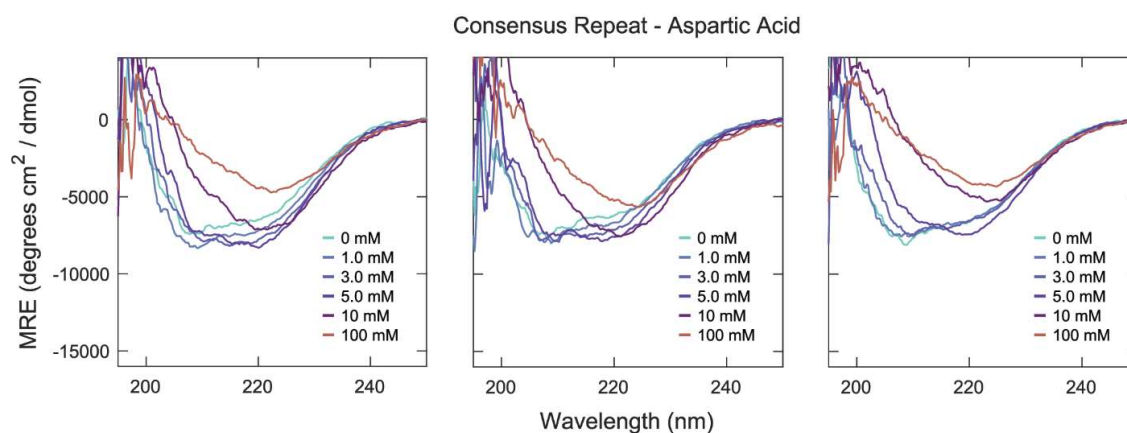

**Figure S26.** Triplicate circular dichroism measurements of consensus repeat – aspartic acid.

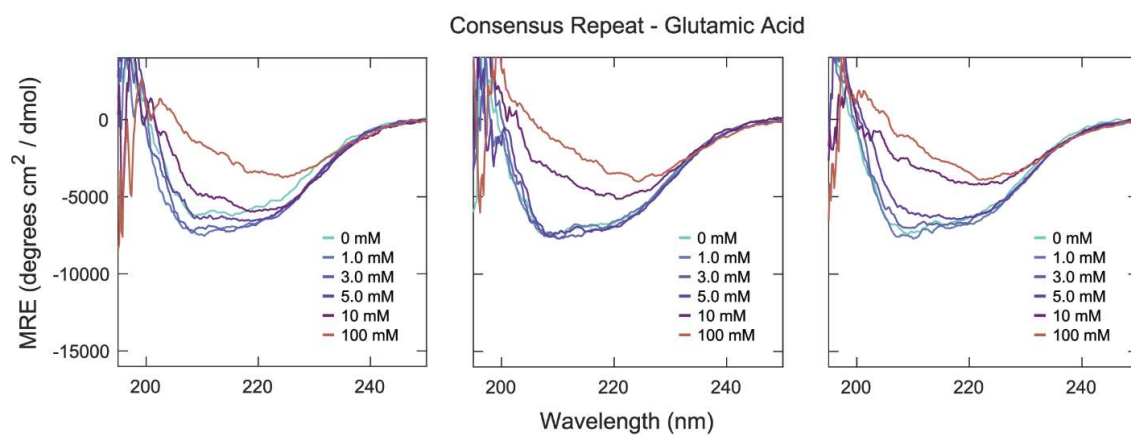

**Figure S27.** Triplicate circular dichroism measurements of consensus repeat – glutamic acid.

## VII. Circular Dichroism Time Studies

To assess the equilibration of structural changes upon mixing with calcium, time-dependent circular dichroism spectroscopy was conducted using two conditions that would be most sensitive to slow folding dynamics:

- Block V in 1 mM CaCl<sub>2</sub>, slightly above its  $K_d$  of 0.67 mM
- Global substitution with glutamic acid in 50 mM CaCl<sub>2</sub>, slightly above its  $K_d$  of 11 mM

In both conditions, circular dichroism spectra indicated weaker structural signals than those observed at higher CaCl<sub>2</sub> concentrations. We sought to investigate whether longer incubation with lower CaCl<sub>2</sub> concentration would lead to conformational changes observed at higher CaCl<sub>2</sub> concentrations. Time-dependent circular dichroism spectra were acquired at 15-minute intervals over the course of 60 minutes. In both cases, circular dichroism spectra did not exhibit significant time-dependent changes for 60 minutes after mixing with CaCl<sub>2</sub>.

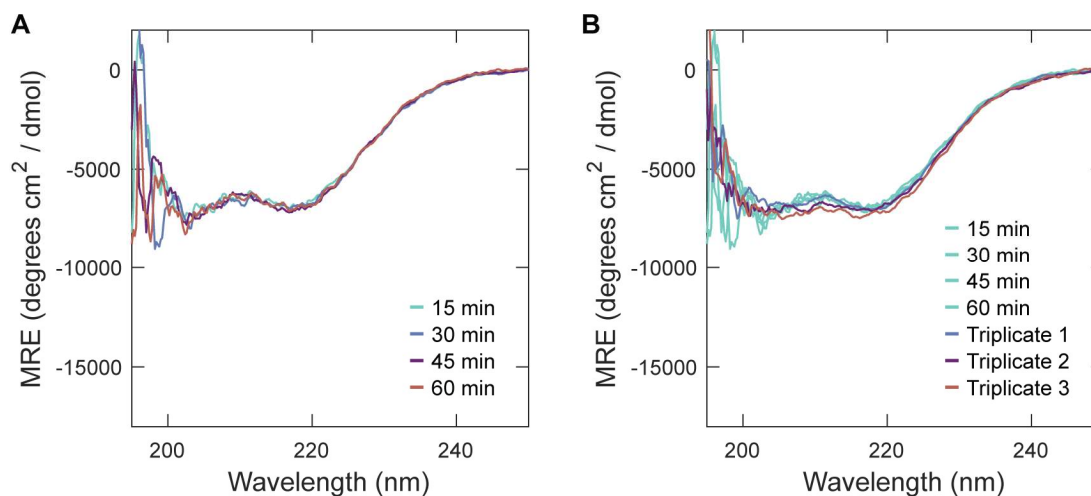

**Figure S28.** Time-dependent circular dichroism of Block V (wild type) in 1 mM CaCl<sub>2</sub>. A) Circular dichroism spectra taken at 15-minute intervals after adding CaCl<sub>2</sub>. B) Comparison between time-dependent circular dichroism and triplicate spectra at 1 mM CaCl<sub>2</sub> (Figure S14).

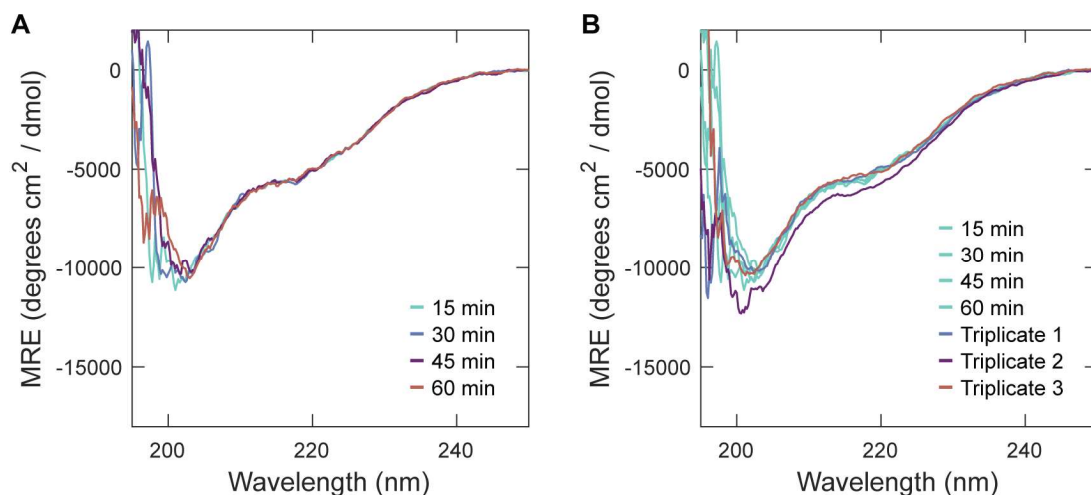

**Figure S29.** Time-dependent circular dichroism of global substitution – glutamic acid in 50 mM CaCl<sub>2</sub>. A) Circular dichroism spectra taken at 15-minute intervals after adding CaCl<sub>2</sub>. B) Comparison between time-dependent circular dichroism and triplicate spectra at 50 mM CaCl<sub>2</sub> (Figure S20).



### VIII. Results from deconvolution of circular dichroism data with CDPro

The results from the CDSSTR, CONTIN/LL, and SELCON3 methods were normalized and averaged to facilitate quantitative comparisons. For the reference set used (SPD48), CONTIN/LL performs best overall, and best for the distorted  $\alpha$ -helix, regular  $\beta$ -sheet, turn, and unordered structures. SELCON3 performs best for regular  $\alpha$ -helix, and CDSSTR performs best for distorted  $\beta$ -sheet.<sup>2</sup> Averaging these methods improves the overall reliability. Regular and distorted helix and sheet components were combined to quantify total helix and sheet content. Data presented are the averages of CDPro results from triplicate circular dichroism measurements.

<sup>2</sup>N. Sreerama, R. W. Woody, Estimation of Protein Secondary Structure from Circular Dichroism Spectra: Comparison of CONTIN, SELCON, and CDSSTR Methods with an Expanded Reference Set. *Analytical Biochemistry* **287**, 252-260 (2000).

**Table S2. CDPro results**

| Protein Variant | CaCl <sub>2</sub> (mM) | Method    | $\alpha_R$ | $\alpha_D$ | $\beta_R$ | $\beta_D$ | T     | U     |
|-----------------|------------------------|-----------|------------|------------|-----------|-----------|-------|-------|
| Block V         | 0                      | CONTIN/LL | 0.026      | 0.045      | 0.110     | 0.065     | 0.111 | 0.643 |
|                 |                        | SELCON3   | 0.032      | 0.054      | 0.113     | 0.072     | 0.134 | 0.569 |
|                 |                        | CDSSTR    | 0.013      | 0.034      | 0.118     | 0.070     | 0.128 | 0.626 |
|                 | 0.1                    | CONTIN/LL | 0.026      | 0.045      | 0.111     | 0.064     | 0.107 | 0.647 |
|                 |                        | SELCON3   | 0.032      | 0.051      | 0.109     | 0.070     | 0.132 | 0.583 |
|                 |                        | CDSSTR    | 0.015      | 0.032      | 0.108     | 0.066     | 0.115 | 0.653 |
|                 | 0.3                    | CONTIN/LL | 0.027      | 0.045      | 0.115     | 0.066     | 0.114 | 0.631 |
|                 |                        | SELCON3   | 0.031      | 0.049      | 0.106     | 0.067     | 0.123 | 0.602 |
|                 |                        | CDSSTR    | 0.016      | 0.033      | 0.113     | 0.068     | 0.126 | 0.636 |
|                 | 0.5                    | CONTIN/LL | 0.027      | 0.040      | 0.124     | 0.071     | 0.138 | 0.060 |
|                 |                        | SELCON3   | 0.031      | 0.046      | 0.102     | 0.067     | 0.126 | 0.614 |
|                 |                        | CDSSTR    | 0.019      | 0.033      | 0.111     | 0.071     | 0.131 | 0.627 |
|                 | 1                      | CONTIN/LL | 0.033      | 0.059      | 0.156     | 0.097     | 0.186 | 0.467 |
|                 |                        | SELCON3   | 0.044      | 0.059      | 0.144     | 0.092     | 0.181 | 0.490 |
|                 |                        | CDSSTR    | 0.015      | 0.035      | 0.163     | 0.101     | 0.198 | 0.485 |
|                 | 3                      | CONTIN/LL | 0.035      | 0.058      | 0.171     | 0.101     | 0.195 | 0.440 |
|                 |                        | SELCON3   | 0.047      | 0.060      | 0.152     | 0.096     | 0.192 | 0.473 |
|                 |                        | CDSSTR    | 0.014      | 0.039      | 0.171     | 0.105     | 0.207 | 0.459 |
|                 | 5                      | CONTIN/LL | 0.037      | 0.061      | 0.169     | 0.101     | 0.196 | 0.438 |
|                 |                        | SELCON3   | 0.048      | 0.061      | 0.146     | 0.096     | 0.186 | 0.473 |
|                 |                        | CDSSTR    | 0.018      | 0.035      | 0.166     | 0.106     | 0.214 | 0.455 |
|                 | 10                     | CONTIN/LL | 0.032      | 0.053      | 0.167     | 0.104     | 0.206 | 0.438 |
|                 |                        | SELCON3   | 0.033      | 0.058      | 0.167     | 0.105     | 0.192 | 0.468 |
|                 |                        | CDSSTR    | 0.016      | 0.030      | 0.176     | 0.109     | 0.219 | 0.445 |
|                 | 100                    | CONTIN/LL | 0.035      | 0.058      | 0.172     | 0.104     | 0.198 | 0.433 |
|                 |                        | SELCON3   | 0.042      | 0.060      | 0.163     | 0.102     | 0.195 | 0.455 |
|                 |                        | CDSSTR    | 0.018      | 0.033      | 0.175     | 0.107     | 0.216 | 0.448 |

| Protein Variant     | CaCl <sub>2</sub> (mM) | Method    | $\alpha_R$ | $\alpha_D$ | $\beta_R$ | $\beta_D$ | T     | U     |
|---------------------|------------------------|-----------|------------|------------|-----------|-----------|-------|-------|
| Global Substitution |                        |           |            |            |           |           |       |       |
| Alanine             | 0                      | CONTIN/LL | 0.028      | 0.043      | 0.140     | 0.076     | 0.141 | 0.571 |
|                     |                        | SELCON3   | 0.030      | 0.063      | 0.162     | 0.090     | 0.165 | 0.477 |
|                     |                        | CDSSTR    | 0.020      | 0.039      | 0.156     | 0.087     | 0.174 | 0.516 |
|                     | 100                    | CONTIN/LL | 0.036      | 0.049      | 0.166     | 0.094     | 0.200 | 0.456 |
|                     |                        | SELCON3   | 0.046      | 0.052      | 0.149     | 0.097     | 0.177 | 0.462 |
|                     |                        | CDSSTR    | 0.013      | 0.035      | 0.172     | 0.102     | 0.199 | 0.476 |
| Histidine           | 0                      | CONTIN/LL | 0.014      | 0.043      | 0.218     | 0.098     | 0.126 | 0.501 |
|                     |                        | SELCON3   | 0.018      | 0.046      | 0.118     | 0.061     | 0.032 | 0.627 |
|                     |                        | CDSSTR    | 0.010      | 0.033      | 0.193     | 0.104     | 0.187 | 0.469 |
|                     | 100                    | CONTIN/LL | 0.001      | 0.035      | 0.236     | 0.109     | 0.156 | 0.463 |
|                     |                        | SELCON3   | 0.057      | 0.050      | 0.277     | 0.126     | 0.182 | 0.226 |
|                     |                        | CDSSTR    | 0.009      | 0.015      | 0.187     | 0.092     | 0.148 | 0.536 |
| Serine              | 0                      | CONTIN/LL | 0.048      | 0.064      | 0.123     | 0.080     | 0.146 | 0.518 |
|                     |                        | SELCON3   | 0.069      | 0.131      | 0.187     | 0.118     | 0.163 | 0.343 |
|                     |                        | CDSSTR    | 0.032      | 0.045      | 0.161     | 0.082     | 0.157 | 0.515 |
|                     | 100                    | CONTIN/LL | 0.045      | 0.029      | 0.119     | 0.088     | 0.220 | 0.497 |
|                     |                        | SELCON3   | 0.055      | 0.070      | 0.154     | 0.099     | 0.175 | 0.406 |
|                     |                        | CDSSTR    | 0.016      | 0.037      | 0.186     | 0.101     | 0.189 | 0.468 |
| Asparagine          | 0                      | CONTIN/LL | 0.025      | 0.044      | 0.101     | 0.062     | 0.102 | 0.667 |
|                     |                        | SELCON3   | 0.029      | 0.044      | 0.088     | 0.058     | 0.104 | 0.649 |
|                     |                        | CDSSTR    | 0.014      | 0.031      | 0.093     | 0.059     | 0.109 | 0.682 |
|                     | 100                    | CONTIN/LL | 0.032      | 0.057      | 0.167     | 0.099     | 0.192 | 0.454 |
|                     |                        | SELCON3   | 0.042      | 0.056      | 0.150     | 0.096     | 0.185 | 0.485 |
|                     |                        | CDSSTR    | 0.016      | 0.035      | 0.173     | 0.106     | 0.206 | 0.461 |
| Aspartic acid       | 0                      | CONTIN/LL | 0.056      | 0.071      | 0.182     | 0.097     | 0.176 | 0.419 |
|                     |                        | SELCON3   | 0.053      | 0.118      | 0.209     | 0.119     | 0.163 | 0.318 |
|                     |                        | CDSSTR    | 0.035      | 0.058      | 0.186     | 0.086     | 0.175 | 0.460 |
|                     | 100                    | CONTIN/LL | 0.036      | 0.054      | 0.204     | 0.104     | 0.190 | 0.411 |
|                     |                        | SELCON3   | 0.047      | 0.084      | 0.233     | 0.165     | 0.157 | 0.313 |
|                     |                        | CDSSTR    | 0.019      | 0.042      | 0.177     | 0.097     | 0.174 | 0.483 |
| Glutamic acid       | 0                      | CONTIN/LL | 0.016      | 0.040      | 0.091     | 0.055     | 0.085 | 0.714 |
|                     |                        | SELCON3   | 0.033      | 0.053      | 0.095     | 0.063     | 0.113 | 0.623 |
|                     |                        | CDSSTR    | 0.097      | 0.027      | 0.096     | 0.059     | 0.109 | 0.681 |
|                     | 100                    | CONTIN/LL | 0.017      | 0.019      | 0.118     | 0.065     | 0.135 | 0.646 |
|                     |                        | SELCON3   | 0.036      | 0.050      | 0.133     | 0.085     | 0.157 | 0.520 |
|                     |                        | CDSSTR    | 0.011      | 0.032      | 0.150     | 0.089     | 0.170 | 0.540 |



| Protein Variant  | CaCl <sub>2</sub> (mM) | Method    | $\alpha_R$ | $\alpha_D$ | $\beta_R$ | $\beta_D$ | T     | U     |
|------------------|------------------------|-----------|------------|------------|-----------|-----------|-------|-------|
| Consensus Repeat |                        |           |            |            |           |           |       |       |
| Alanine          | 0                      | CONTIN/LL | 0.058      | 0.072      | 0.147     | 0.083     | 0.156 | 0.483 |
|                  |                        | SELCON3   | 0.058      | 0.074      | 0.174     | 0.096     | 0.181 | 0.405 |
|                  |                        | CDSSTR    | 0.048      | 0.058      | 0.141     | 0.082     | 0.162 | 0.500 |
|                  | 100                    | CONTIN/LL | 0.006      | 0.036      | 0.224     | 0.105     | 0.158 | 0.472 |
|                  |                        | SELCON3   | 0.003      | 0.037      | 0.236     | 0.132     | 0.254 | 0.382 |
|                  |                        | CDSSTR    | 0.004      | 0.021      | 0.197     | 0.102     | 0.165 | 0.498 |
| Histidine        | 0                      | CONTIN/LL | 0.077      | 0.083      | 0.142     | 0.085     | 0.170 | 0.442 |
|                  |                        | SELCON3   | 0.071      | 0.084      | 0.187     | 0.103     | 0.196 | 0.345 |
|                  |                        | CDSSTR    | 0.070      | 0.072      | 0.139     | 0.084     | 0.167 | 0.460 |
|                  | 100                    | CONTIN/LL | 0.016      | 0.042      | 0.219     | 0.105     | 0.167 | 0.451 |
|                  |                        | SELCON3   | 0.006      | 0.052      | 0.201     | 0.101     | 0.194 | 0.284 |
|                  |                        | CDSSTR    | 0.011      | 0.024      | 0.197     | 0.101     | 0.171 | 0.487 |
| Serine           | 0                      | CONTIN/LL | 0.034      | 0.052      | 0.132     | 0.077     | 0.127 | 0.579 |
|                  |                        | SELCON3   | 0.029      | 0.043      | 0.110     | 0.074     | 0.155 | 0.581 |
|                  |                        | CDSSTR    | 0.022      | 0.042      | 0.126     | 0.074     | 0.145 | 0.585 |
|                  | 100                    | CONTIN/LL | 0.007      | 0.035      | 0.227     | 0.110     | 0.159 | 0.469 |
|                  |                        | SELCON3   | 0.006      | 0.032      | 0.204     | 0.109     | 0.194 | 0.258 |
|                  |                        | CDSSTR    | 0.006      | 0.016      | 0.201     | 0.103     | 0.165 | 0.495 |
| Asparagine       | 0                      | CONTIN/LL | 0.029      | 0.044      | 0.121     | 0.070     | 0.133 | 0.603 |
|                  |                        | SELCON3   | 0.029      | 0.047      | 0.110     | 0.070     | 0.132 | 0.597 |
|                  |                        | CDSSTR    | 0.021      | 0.035      | 0.123     | 0.072     | 0.136 | 0.601 |
|                  | 100                    | CONTIN/LL | 0.018      | 0.037      | 0.182     | 0.101     | 0.174 | 0.489 |
|                  |                        | SELCON3   | 0.049      | 0.066      | 0.200     | 0.185     | 0.203 | 0.307 |
|                  |                        | CDSSTR    | 0.007      | 0.027      | 0.196     | 0.100     | 0.183 | 0.482 |
| Aspartic acid    | 0                      | CONTIN/LL | 0.085      | 0.086      | 0.150     | 0.092     | 0.183 | 0.404 |
|                  |                        | SELCON3   | 0.076      | 0.085      | 0.197     | 0.106     | 0.207 | 0.302 |
|                  |                        | CDSSTR    | 0.081      | 0.081      | 0.145     | 0.089     | 0.178 | 0.420 |
|                  | 100                    | CONTIN/LL | 0.034      | 0.046      | 0.197     | 0.103     | 0.187 | 0.433 |
|                  |                        | SELCON3   | 0.077      | 0.095      | 0.162     | 0.152     | 0.203 | 0.258 |
|                  |                        | CDSSTR    | 0.018      | 0.031      | 0.191     | 0.100     | 0.187 | 0.469 |
| Glutamic acid    | 0                      | CONTIN/LL | 0.082      | 0.084      | 0.168     | 0.097     | 0.193 | 0.376 |
|                  |                        | SELCON3   | 0.075      | 0.089      | 0.194     | 0.109     | 0.207 | 0.287 |
|                  |                        | CDSSTR    | 0.080      | 0.082      | 0.167     | 0.093     | 0.181 | 0.389 |
|                  | 100                    | CONTIN/LL | 0.025      | 0.047      | 0.221     | 0.108     | 0.174 | 0.425 |
|                  |                        | SELCON3   | 0.004      | 0.043      | 0.192     | 0.098     | 0.204 | 0.321 |
|                  |                        | CDSSTR    | 0.013      | 0.028      | 0.190     | 0.100     | 0.176 | 0.485 |

$\alpha_R$ , regular  $\alpha$ -helix;  $\alpha_D$ , distorted  $\alpha$ -helix;  $\beta_R$ , regular  $\beta$ -sheet;  $\beta_D$ , distorted  $\beta$ -sheet; T, turns; U, unordered
